# Supplementary material for: Lower developmental potential of rat zygotes produced by ooplasmic injection of testicular spermatozoa versus cauda epididymal spermatozoa
Source: PubMed Central journal article supplement — J Reprod Dev. 2024 May 11;70(4):254–8. doi: 10.1262/jrd.2024-030 (PMC11310386; doi:10.1262/jrd.2024-030), 2024-05-11
Supplement: jrd-70-254-s001.pdf [file jrd-70-254-s001.pdf]

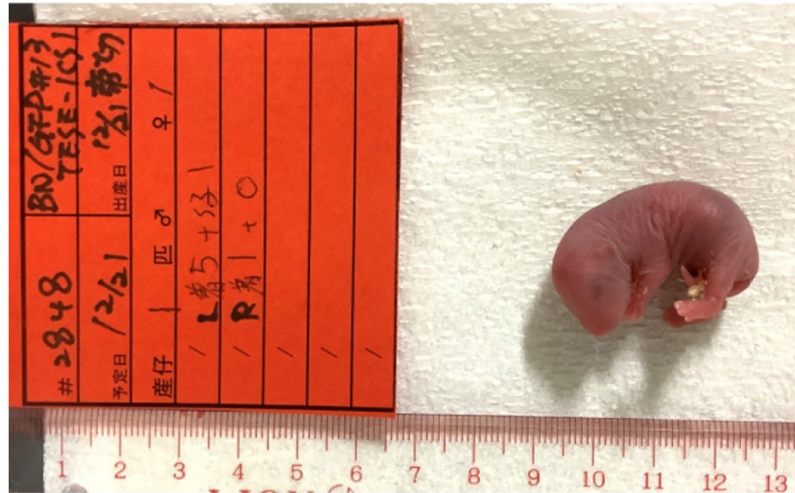

**Supplementary Fig. 1.** The first successful delivery of BN offspring from the TESE-ICSI zygotes (21st December 2022).

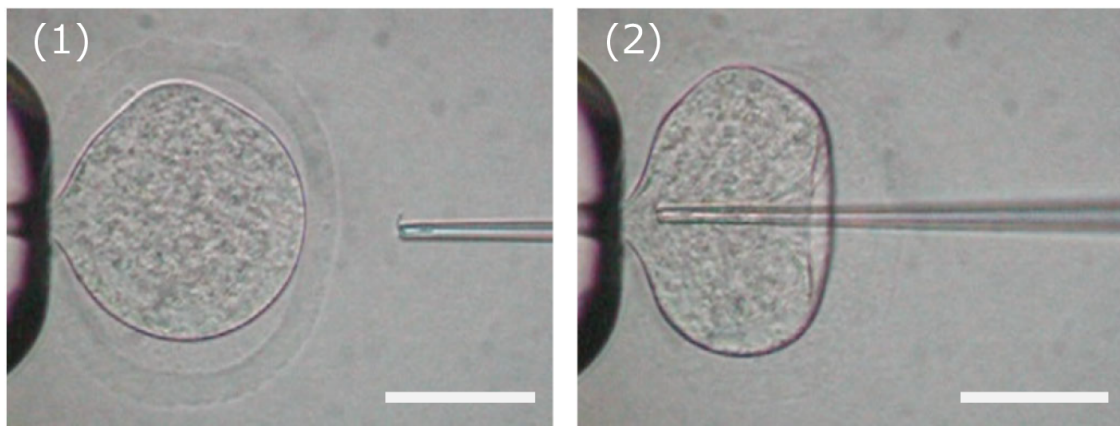

**Supplementary Fig. 2.** Unique rat ICSI/TESE-ICSI procedure. (1) The sperm head is suspended at the tip of the injection pipette. (2) The pipette tip is mechanically advanced deep into the oocyte, extensively stretching the oolemma. Scale bar = 50  $\mu$ m.
